# Supplementary material for: Understanding Aotearoa New Zealand University Students Intentions to Seek Help If Experiencing Mental Distress: A Comparison of Naturalistic and Interventional Findings
Source: MDPI journal article supplement (doi:10.3390/ijerph192315836), 2022-11-28
Supplement: s1 [file s1]

## Supplementary Analyses

Table S1. Spearman's rho Intercorrelations between Suicidal Ideation, Stigma, and symptoms of Depression, Anxiety, and Stress at Time One, Study One.

|                   | <b>Depression</b> |     | <b>Anxiety</b> |     | <b>Stress</b> |     | <b>Stigma</b> |     |
|-------------------|-------------------|-----|----------------|-----|---------------|-----|---------------|-----|
| Depression        | —                 |     |                |     |               |     |               |     |
| Anxiety           | 0.575             | *** | —              |     |               |     |               |     |
| Stress            | 0.686             | *** | 0.694          | *** | —             |     |               |     |
| Stigma            | 0.198             | *** | 0.211          | *** | 0.174         | *** | —             |     |
| Suicidal Ideation | 0.437             | *** | 0.367          | *** | 0.316         | *** | 0.169         | *** |

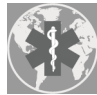

Table S2. Linear Mixed Models examining Group X Time interactions for each help-seeking barrier.

|                              | R1        |               |               | R2        |              |               | R3        |              |               | R4        |              |               | R5        |               |               |
|------------------------------|-----------|---------------|---------------|-----------|--------------|---------------|-----------|--------------|---------------|-----------|--------------|---------------|-----------|---------------|---------------|
| Predictors                   | Estimate  | CI            | p             | Estimate  | CI           | zz            | Estimate  | CI           | p             | Estimate  | CI           | p             | Estimate  | CI            | p             |
| (Intercept)                  | 3.07      | 2.75 – 3.38   | <0.001        | 2.5       | 2.18 – 2.82  | <0.001        | 3.43      | 3.11 – 3.75  | <0.001        | 2.7       | 2.36 – 3.05  | <0.001        | 3.05      | 2.72 – 3.38   | <0.001        |
| Group [I]                    | 0.34      | -0.11 – 0.79  | 0.141         | 0.12      | -0.34 – 0.58 | 0.61          | -0.46     | -0.91 – 0.00 | 0.05          | -0.49     | -0.98 – 0.00 | 0.05          | 0.1       | -0.37 – 0.57  | 0.685         |
| Group [V]                    | 0.14      | -0.29 – 0.58  | 0.515         | -0.03     | -0.48 – 0.41 | 0.888         | -0.22     | -0.66 – 0.22 | 0.332         | -0.36     | -0.84 – 0.11 | 0.135         | 0.12      | -0.33 – 0.58  | 0.593         |
| Time [T2]                    | 0.2       | -0.13 – 0.54  | 0.227         | 0.09      | -0.23 – 0.41 | 0.576         | -0.07     | -0.39 – 0.25 | 0.674         | -0.11     | -0.41 – 0.19 | 0.458         | -0.07     | -0.38 – 0.24  | 0.664         |
| Time [T3]                    | -0.05     | -0.38 – 0.29  | 0.788         | 0.07      | -0.25 – 0.39 | 0.675         | -0.23     | -0.55 – 0.09 | 0.162         | -0.39     | -0.69 – 0.09 | 0.012         | -0.09     | -0.40 – 0.22  | 0.562         |
| Group [I] * Time [T2]        | -0.63     | -1.11 – -0.16 | 0.009         | -0.14     | -0.60 – 0.32 | 0.552         | 0.12      | -0.34 – 0.57 | 0.618         | 0.09      | -0.34 – 0.52 | 0.682         | 0.04      | -0.40 – 0.48  | 0.843         |
| Group [V] * Time [T2]        | -0.12     | -0.58 – 0.34  | 0.612         | -0.2      | -0.64 – 0.25 | 0.384         | 0.17      | -0.27 – 0.62 | 0.44          | 0.03      | -0.39 – 0.45 | 0.894         | -0.1      | -0.53 – 0.33  | 0.64          |
| Group [I] * Time [T3]        | -0.1      | -0.57 – 0.38  | 0.688         | -0.12     | -0.57 – 0.34 | 0.619         | 0.42      | -0.04 – 0.87 | 0.073         | 0.43      | 0.00 – 0.86  | 0.048         | -0.03     | -0.47 – 0.41  | 0.9           |
| Group [V] * Time [T3]        | 0.28      | -0.18 – 0.74  | 0.236         | 0.06      | -0.39 – 0.50 | 0.793         | 0.29      | -0.15 – 0.73 | 0.198         | 0.28      | -0.14 – 0.70 | 0.19          | 0.2       | -0.23 – 0.63  | 0.366         |
| Random Effects               |           |               |               |           |              |               |           |              |               |           |              |               |           |               |               |
| $\sigma^2$                   |           |               | 0.63          |           |              | 0.63          |           |              | 0.63          |           |              | 0.63          |           |               | 0.63          |
| $\tau_{00}$                  |           | 0.49          | StudentID     |           | 0.49         | StudentID     |           | 0.49         | StudentID     |           | 0.49         | StudentID     |           | 0.49          | StudentID     |
| ICC                          |           |               | 0.44          |           |              | 0.44          |           |              | 0.44          |           |              | 0.44          |           |               | 0.44          |
| N                            |           | 133           | StudentID     |           | 133          | StudentID     |           | 133          | StudentID     |           | 133          | StudentID     |           | 133           | StudentID     |
| Observations                 |           |               | 399           |           |              | 399           |           |              | 399           |           |              | 399           |           |               | 399           |
| Marginal R2 / Conditional R2 |           |               | 0.021 / 0.450 |           |              | 0.021 / 0.450 |           |              | 0.021 / 0.450 |           |              | 0.021 / 0.450 |           |               | 0.021 / 0.450 |
|                              | R6        |               |               | R7        |              |               | R8        |              |               | R9        |              |               | R10       |               |               |
| Predictors                   | Estimates | CI            | p             | Estimates | CI           | p             | Estimates | CI           | p             | Estimates | CI           | p             | Estimates | CI            | p             |
| (Intercept)                  | 3.14      | 2.76 – 3.51   | <0.001        | 3.07      | 2.72 – 3.42  | <0.001        | 2.57      | 2.21 – 2.92  | <0.001        | 2.2       | 1.85 – 2.56  | <0.001        | 2.57      | 2.23 – 2.90   | <0.001        |
| Group [I]                    | 0.36      | -0.17 – 0.90  | 0.182         | -0.14     | -0.64 – 0.36 | 0.58          | -0.04     | -0.55 – 0.46 | 0.864         | 0.03      | -0.48 – 0.54 | 0.89          | -0.31     | -0.79 – 0.17  | 0.209         |
| Group [V]                    | 0.18      | -0.34 – 0.70  | 0.49          | -0.07     | -0.56 – 0.42 | 0.78          | -0.19     | -0.68 – 0.31 | 0.462         | -0.27     | -0.77 – 0.23 | 0.28          | -0.57     | -1.03 – -0.10 | 0.017         |

|                |                              |       |              |               |       |               |               |           |              |               |           |              |               |           |              |               |           |
|----------------|------------------------------|-------|--------------|---------------|-------|---------------|---------------|-----------|--------------|---------------|-----------|--------------|---------------|-----------|--------------|---------------|-----------|
|                |                              |       |              |               |       |               | 0.02          |           |              |               |           |              | 0.78          |           |              |               |           |
|                | Time [T2]                    | -0.07 | -0.39 – 0.25 | 0.676         | -0.39 | -0.72 – -0.05 | 5             | -0.11     | -0.45 – 0.22 | 0.505         | 0.05      | -0.28 – 0.37 | 5             | -0.25     | -0.55 – 0.05 | 0.102         |           |
|                |                              |       |              |               |       |               | 0.06          |           |              |               |           |              | 0.58          |           |              |               |           |
|                | Time [T3]                    | -0.2  | -0.53 – 0.12 | 0.211         | -0.32 | -0.66 – 0.02  | 5             | -0.05     | -0.38 – 0.29 | 0.79          | 0.09      | -0.24 – 0.42 | 5             | -0.14     | -0.44 – 0.16 | 0.372         |           |
|                |                              |       |              |               |       |               | 0.75          |           |              |               |           |              | 0.92          |           |              |               |           |
|                | Group [I] * Time [T2]        | 0.16  | -0.30 – 0.62 | 0.484         | 0.08  | -0.41 – 0.56  | 5             | 0.19      | -0.29 – 0.66 | 0.448         | -0.02     | -0.49 – 0.45 | 8             | 0.11      | -0.32 – 0.54 | 0.624         |           |
|                |                              |       |              |               |       |               | 0.98          |           |              |               |           |              | 0.93          |           |              |               |           |
|                | Group [V] * Time [T2]        | -0.31 | -0.76 – 0.13 | 0.166         | 0     | -0.47 – 0.47  | 9             | 0.18      | -0.29 – 0.64 | 0.454         | 0.02      | -0.44 – 0.47 | 7             | 0.16      | -0.25 – 0.58 | 0.438         |           |
|                |                              |       |              |               |       |               | 0.72          |           |              |               |           |              |               |           |              |               |           |
|                | Group [I] * Time [T3]        | -0.01 | -0.47 – 0.45 | 0.967         | -0.09 | -0.57 – 0.40  | 5             | 0.09      | -0.39 – 0.57 | 0.703         | 0.08      | -0.39 – 0.54 | 0.75          | 0.14      | -0.29 – 0.57 | 0.533         |           |
|                |                              |       |              |               |       |               | 0.86          |           |              |               |           |              | 0.80          |           |              |               |           |
|                | Group [V] * Time [T3]        | 0.03  | -0.41 – 0.48 | 0.88          | 0.04  | -0.43 – 0.51  | 2             | 0.26      | -0.21 – 0.72 | 0.276         | 0.06      | -0.40 – 0.51 | 2             | 0.22      | -0.20 – 0.64 | 0.298         |           |
| Random Effects |                              |       |              |               |       |               |               |           |              |               |           |              |               |           |              |               |           |
|                | σ2                           |       |              | 0.63          |       |               | 0.63          |           |              | 0.63          |           |              | 0.63          |           |              | 0.63          |           |
|                | τ00                          |       | 0.49         | StudentID     |       |               | 0.49          | StudentID |              | 0.49          | StudentID |              | 0.49          | StudentID |              | 0.49          | StudentID |
|                | ICC                          |       |              | 0.44          |       |               | 0.44          |           |              | 0.44          |           |              | 0.44          |           |              | 0.44          |           |
|                | N                            |       | 133          | StudentID     |       |               | 133           | StudentID |              | 133           | StudentID |              | 133           | StudentID |              | 133           | StudentID |
|                | Observations                 |       |              | 399           |       |               | 399           |           |              | 399           |           |              | 399           |           |              | 399           |           |
|                | Marginal R2 / Conditional R2 |       |              | 0.021 / 0.450 |       |               | 0.021 / 0.450 |           |              | 0.021 / 0.450 |           |              | 0.021 / 0.450 |           |              | 0.021 / 0.450 |           |

R1: You do not believe that your distress is/was not serious enough to warrant professional help; R2: You are not sure the available treatments are very effective; R3: You would want to handle the problem on your own; R4: You would be too embarrassed ; R5: You would talk to friends or relatives instead ; R6: You think it costs too much money ; R7: You are unsure of where to go or who to see ; R8: You anticipate problems with time, transportation, or scheduling ; R9: You are afraid it might harm you school or professional career ; R10: You would worry that people would treat you differently if they knew were in treatment.
